# Supplementary material for: Properties of Eco-Friendly Composites Based on Post-Consumer Recycled Resin Filled with Walnut Shell Powder
Source: MDPI journal article supplement (doi:10.3390/polym15224389), 2023-11-12
Supplement: s1 [file s1]

# Properties of Eco-Friendly Composites Based on Post-Consumer Recycled Resin Filled with Walnut Shell Powder

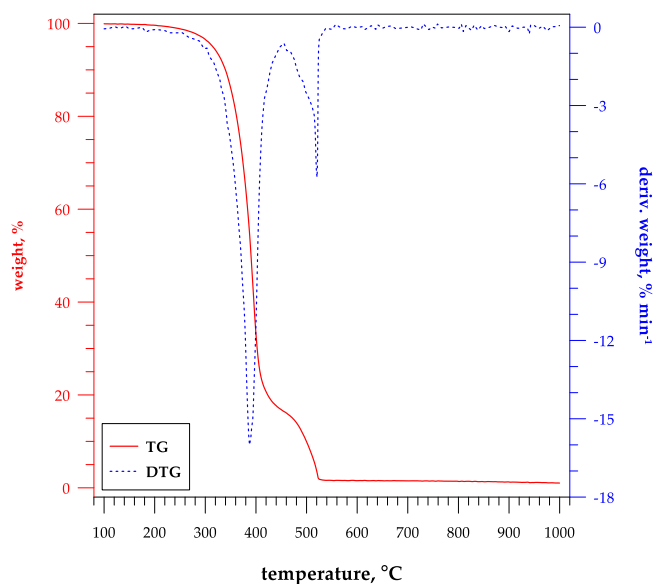

(a)

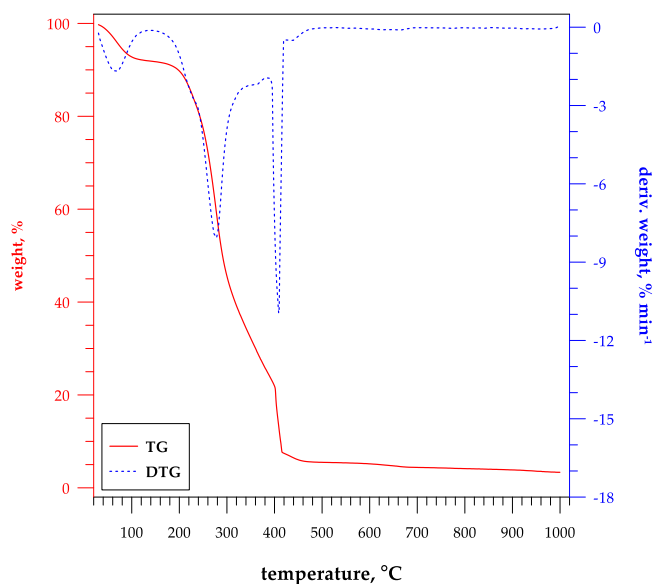

(b)

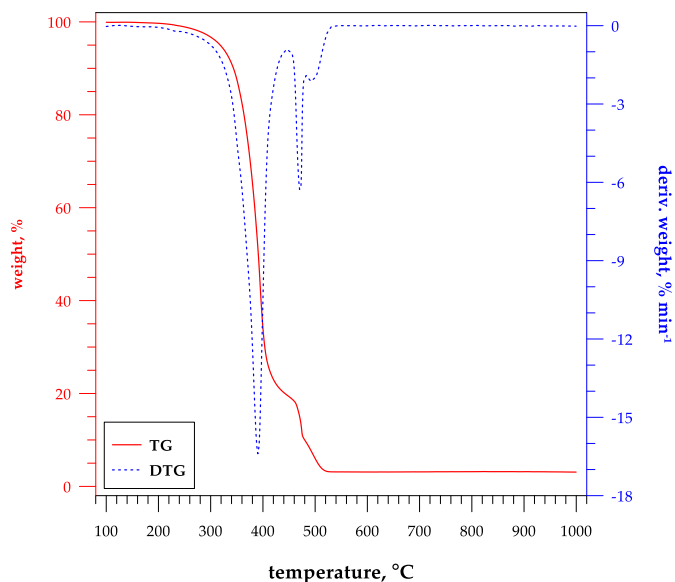

(c)

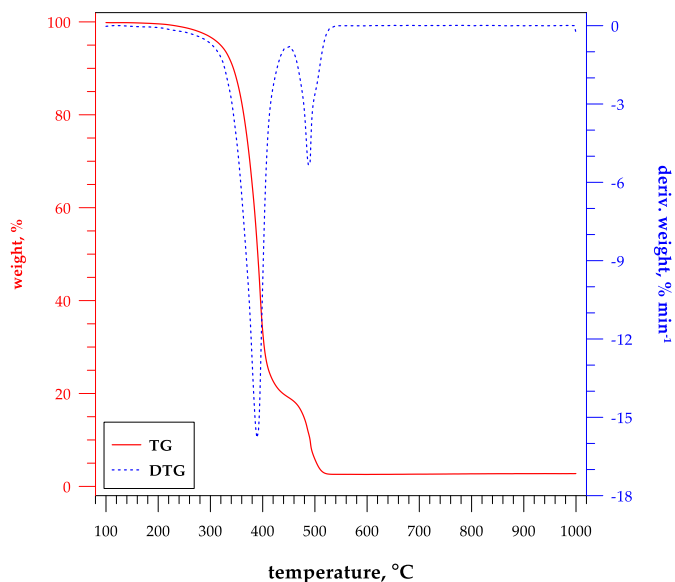

(d)

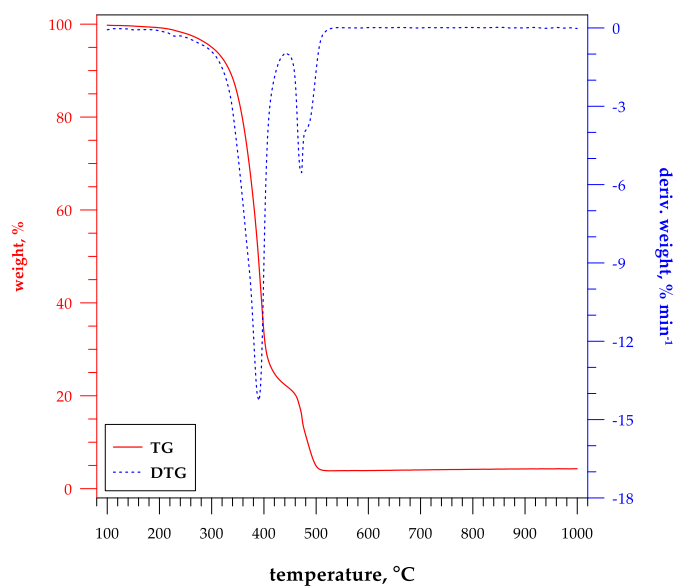

(e)

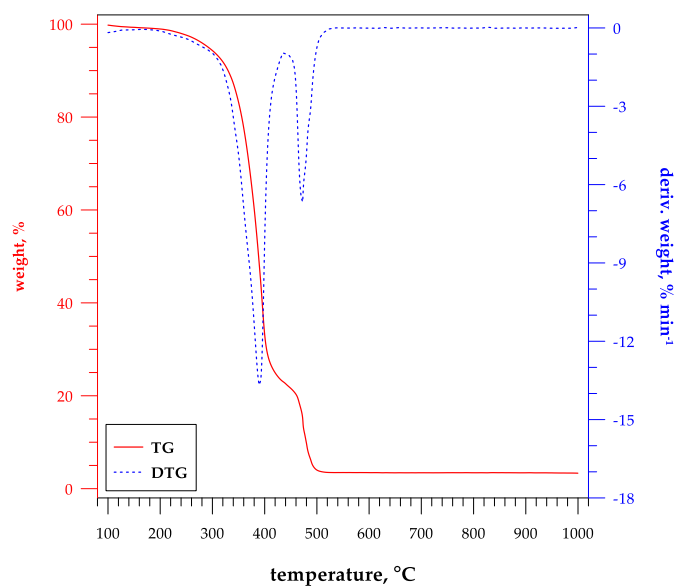

(f)

**Figure S1.** Thermal decomposition of the UPR/WSP composites. TG and DTG curves of (a) pure UPR; (b) walnut shell powder; (c) UPR+W2; (d) UPR+W5; (e) UPR+W7; (f) UPR+W10.

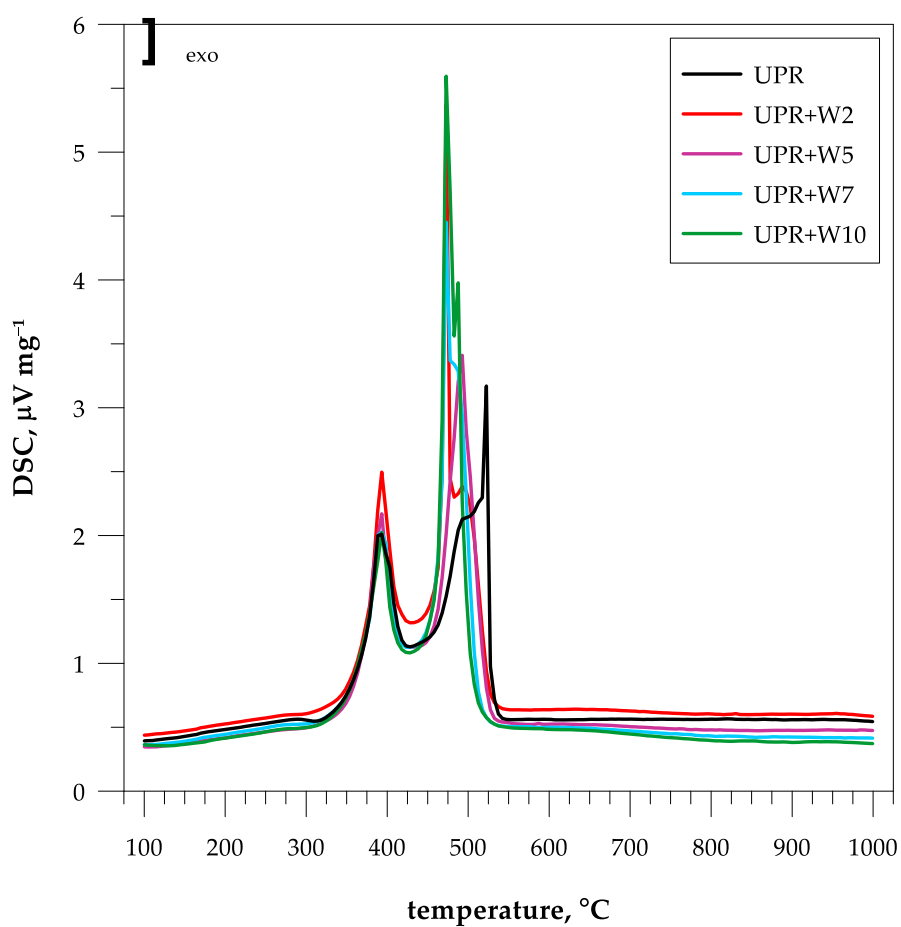

**Figure S2.** DSC curves of the UPR/WSP composites.
